# Supplementary material for: Determining the number of hidden layer and hidden neuron of neural network for wind speed prediction
Source: PeerJ Comput Sci. 2021 Sep 20;7:e724. doi: 10.7717/peerj-cs.724 (PMC8459779; doi:10.7717/peerj-cs.724)
Supplement: Supplemental Information 2 — This dataset had many features, but researchers only selected attributes related to wind speed prediction. There are four input attributes, including CR10 Temperature, Last Minute Average Temperature, Maximum Hourly Air Temperature, and Minimum Hourly Air Temperature. These attributes have a role to predict the output attribute (Wind Speed). [file peerj-cs-07-724-s002.xlsx]

## Sheet: Sheet1
CR10 Temperature	Last Minute Average Temperature	Maximum Hourly Air Temperature	Minimum Hourly Air Temperature	Wind Speed 10 Minutes
14.69	6.505	7.06	6.505	7.01
14.64	5.938	6.482	5.938	4.14
14.6	5.366	5.921	5.36	3.647
14.55	5.164	5.411	5.066	2.216
14.51	5.291	5.291	5.151	1.444
14.43	4.992	5.355	4.879	0.816
14.38	4.534	5.004	4.524	3.653
14.31	4.424	4.581	4.172	4.411
14.23	4.145	4.548	4.145	5.347
14.16	3.862	4.232	3.8	5.903
14.07	4.973	4.973	3.866	7.38
14	5.654	5.654	5.042	8.22
13.93	7.41	7.41	5.703	11.22
13.87	7.78	7.81	7.42	10.45
13.84	8	8.06	7.76	10.45
13.84	8.31	8.31	8.01	11.08
13.84	8.03	8.34	8.01	12.68
13.8	8.2	8.2	8	12.8
13.78	8.35	8.41	8.18	13.96
13.73	8.46	8.46	8.31	16.21
13.69	8.63	8.63	8.38	14.55
13.69	8.73	8.73	8.6	15.45
13.73	8.75	8.76	8.64	12.82
13.71	8.51	8.75	8.51	11.32
13.73	8.55	8.58	8.38	11.24
13.73	8.69	8.86	8.57	13.44
13.73	9	9	8.67	12.2
13.75	9.55	9.55	8.98	11.09
13.8	9.98	9.98	9.56	10.44
13.84	10.08	10.16	9.98	12.68
13.89	10.46	10.49	10.03	12.98
13.91	10.02	10.58	10.02	12.95
13.96	10.01	10.03	9.81	9.73
14	10.57	10.58	10.01	12.37
14.05	10.46	10.84	10.46	11.8
14.09	10.66	10.66	10.38	13.18
14.14	10.64	10.72	10.47	14.17
14.18	10.31	10.75	10.31	13.25
14.2	10.36	10.46	10.3	12.21
14.23	10.5	10.5	10.3	10.04
14.29	10.92	10.93	10.52	7.98
14.38	11.32	11.41	10.93	9.25
14.47	11.06	11.41	11.06	13.21
14.51	11.07	11.07	10.79	12.26
14.56	10.94	11.12	10.94	16.07
14.58	10.54	10.97	10.52	11.35
14.6	10.51	10.52	10.31	12.61
14.63	10.65	10.68	10.5	10.76
14.65	10.54	10.68	10.53	12.17
14.65	9.66	10.54	9.57	15.95
14.6	9.32	9.73	9.28	19.2
14.49	8.54	9.28	8.54	15.34
14.38	8.05	8.54	8.05	10.29
14.34	7.37	8.04	7.37	6.987
14.34	7.11	7.46	7.11	5.678
14.34	7.01	7.16	6.86	4.029
14.32	7.32	7.45	6.961	6.025
14.25	8.92	8.92	7.26	9.12
14.23	9.42	9.42	8.92	11.64
14.2	9.41	9.56	9.4	11.22
14.16	9.4	9.42	9.28	14.52
14.11	9.17	9.43	9.17	14.97
14.09	9.15	9.22	9	14.64
14.09	9.68	9.77	9.15	12.29
14.11	9.21	9.68	9.19	7.47
14.14	8.73	9.25	8.64	3.593
14.18	8.64	8.74	8.64	5.181
14.23	8.37	8.64	8.37	4.388
14.23	8.24	8.37	8.23	6.385
14.18	8.16	8.39	8.15	6.224
14.16	8.35	8.35	7.99	5.983
14.11	8.27	8.39	8.27	6.717
14.09	7.83	8.25	7.83	6.414
14.07	7.81	7.86	7.67	7.2
14.07	7.57	7.85	7.57	6.794
14.05	7.43	7.61	7.41	5.957
14	7.68	7.73	7.39	5.353
13.98	7.69	7.8	7.61	7.92
13.96	7.81	7.87	7.7	7.89
13.91	7.98	7.98	7.62	8.81
13.89	8.03	8.12	7.92	8.66
13.84	8.62	8.67	8.02	10
13.82	9.03	9.03	8.56	8.05
13.8	9.98	10.01	9.05	10.63
13.84	10.8	10.89	10	8.04
13.91	10.22	11	10.21	7.14
14	9.95	10.2	9.56	5.855
14.11	9.96	10.17	9.5	5.279
14.23	9.57	10.07	9.57	6.049
14.29	9.3	9.58	9.3	8.54
14.96	8.92	9.27	8.89	9.13
14.47	8.54	8.95	8.49	8.12
14.4	8.53	8.55	8.38	7.22
14.38	8.65	8.78	8.53	8.42
14.36	8.73	8.73	8.62	7.86
14.34	8.82	8.89	8.66	8.37
14.34	9.13	9.13	8.68	9.49
14.36	9.11	9.19	9.06	10.92
14.36	9.09	9.09	8.97	8.99
14.36	8.8	9.1	8.78	7.22
14.38	8.6	8.82	8.6	4.843
14.38	8.71	8.77	8.59	5.084
14.38	8.45	8.73	8.42	6.105
14.38	8.24	8.47	8.2	3.987
14.36	7.89	8.24	7.89	3.166
14.34	8.07	8.16	7.88	4.252
14.32	8.76	8.76	8.04	4.827
14.32	9.86	10.3	8.8	5.893
14.34	9.34	10.01	9.27	7.61
14.41	9.85	9.98	9.3	4.676
14.52	10.05	10.28	9.83	3.902
14.6	9.89	10.11	9.83	2.51
14.69	9.95	10.15	9.8	3.687
14.76	9.58	10.17	9.58	3.911
14.8	9.51	9.64	9.44	3.026
14.84	9.23	9.59	9.18	3.522
14.91	8.96	9.23	8.95	4.416
14.93	8.84	8.98	8.81	4.427
14.93	8.43	8.84	8.43	3.292
14.93	7.97	8.5	7.8	1.423
14.93	7.74	8.11	7.66	2.733
14.91	8.06	8.17	7.54	0.595
14.91	7.91	8.24	7.71	3.308
14.93	8.17	8.21	7.84	1.631
14.91	7.66	8.21	7.57	0.857
14.91	7.79	7.95	7.49	1.102
14.89	7.58	7.81	7.44	0.231
14.89	7.76	8.07	7.58	2.04
14.89	7.63	7.79	7.42	1.937
14.89	7.8	7.8	7.41	3.056
14.87	8	8.2	7.73	2.67
14.84	8.12	8.25	7.63	1.82
14.84	8.27	8.32	8.02	3.647
14.87	8.49	8.56	8.19	3.711
14.93	9.52	9.93	8.51	2.46
15.03	8.26	9.65	8.19	5.138
15.07	7.51	8.3	7.48	6.028
15.05	7.92	7.98	7.46	0.429
15.07	7.35	8.03	7.33	3.734
15.07	7.09	7.42	7.09	3.335
15.03	6.984	7.18	6.87	3.843
15	6.543	7.05	6.543	4.106
14.93	6.618	6.701	6.485	5.092
14.87	6.75	6.75	6.589	5.868
14.78	7.3	7.3	6.71	7.43
14.71	8.16	8.16	7.28	7.64
14.67	8.43	8.45	8.14	8.25
14.62	9.01	9.01	8.42	9.53
14.6	8.97	9.04	8.92	13.52
14.55	8.37	8.96	8.37	14.45
14.49	8.01	8.36	7.94	11.08
14.47	8.28	8.28	8.02	9.41
14.45	8.66	8.67	8.28	8.75
14.45	9.34	9.34	8.65	4.388
14.47	10.31	10.31	9.41	11.32
14.47	10.35	10.69	10.31	13.56
14.45	10.09	10.37	9.69	18.09
14.43	7.84	9.97	7.72	18.95
14.43	8.23	8.34	7.91	23.64
14.4	8.26	8.35	8.12	20.44
14.38	8.03	8.37	8.02	12.5
14.31	7.7	8.06	7.7	13.09
14.23	7.19	7.69	7.19	11.68
14.14	6.769	7.18	6.769	12.1
14.02	6.312	6.757	6.23	12.64
13.87	5.863	6.284	5.845	12.39
13.73	5.592	6.009	5.592	10.68
13.57	5.082	5.55	5.082	11.58
13.42	4.543	5.094	4.525	9.09
13.28	4.591	4.686	4.556	8.09
13.17	4.819	4.96	4.601	6.123
13.1	5.212	5.274	4.818	4.891
13.08	5.252	5.346	5.173	5.34
13.04	5.073	5.26	4.948	4.368
12.97	5.342	5.452	4.993	7.87
12.9	5.914	5.914	5.067	8.03
12.86	6.247	6.247	5.894	8.48
12.79	6.704	6.954	6.188	7.41
12.77	7.52	7.52	6.714	7.34
12.77	7.87	8	7.53	7.25
12.81	9.13	9.13	7.92	6.263
12.88	9.72	9.72	9.13	8.83
12.95	9.67	9.77	9.54	8.36
13.01	8.97	9.69	8.97	8.03
13.13	8.41	8.93	8.4	7.23
13.19	8.21	8.41	8.21	7.22
13.24	8.12	8.22	8.09	7.15
13.28	8.35	8.38	8.13	6.902
13.33	8.24	8.35	8.17	6.496
13.35	7.92	8.22	7.9	6.686
13.37	8.55	8.55	7.89	7.97
13.39	8.44	8.65	8.41	7.05
13.44	8.66	8.72	8.46	6.662
13.48	8.75	8.78	8.58	8.63
13.51	8.6	8.9	8.6	6.412
13.53	8.9	8.94	8.6	7.42
13.57	8.64	9	8.64	5.707
13.62	8.61	8.65	8.5	5.965
13.66	8.84	8.84	8.61	6.717
13.69	8.96	8.98	8.8	7.85
13.69	9.06	9.06	8.8	8.91
13.69	9.19	9.25	8.96	7.63
13.69	10.03	10.03	9.19	8.87
13.71	10.89	10.93	10.03	10.15
13.75	10.87	11.18	10.69	12.21
13.8	10.96	11.03	10.8	9.64
13.89	11.08	11.17	10.5	12.1
13.96	11.23	11.29	11	12.91
14.02	11.12	11.24	11.11	13.24
14.07	10.8	11.18	10.74	14.46
14.09	10.48	10.86	10.12	22.38
14.11	10.54	10.72	10.54	14.56
14.14	10.99	10.99	10.43	16.07
14.11	10.51	11.1	10.47	17.91
14.05	7.2	10.32	7.05	11.78
14	7.49	7.69	7.31	12.04
13.96	7.5	7.55	7.3	11.97
13.91	6.992	7.51	6.673	9.28
13.87	7.12	7.32	6.979	10.6
13.8	6.696	7.12	6.665	7.6
13.75	7.3	7.3	6.537	9.93
13.66	7.31	7.66	7.16	10.65
13.57	7.73	7.73	7.31	10.51
13.48	7.05	7.89	7.05	11.46
13.39	6.219	7.02	6.217	9.04
13.3	6.742	6.742	6.198	10.19
13.22	7.2	7.2	6.75	9.34
13.17	7.34	7.34	7.16	9.24
13.13	8.38	8.53	7.34	12.37
13.1	8.8	8.82	8.44	9.29
13.15	8.11	9.14	8.02	8.58
13.22	8.26	8.26	8.07	8.01
13.26	7.09	8.38	7.09	8.92
13.28	6.456	7.06	6.364	7.12
13.3	6.251	6.487	6.228	8.33
13.28	6.299	6.436	6.274	8.3
13.26	6.111	6.341	6.111	7.41
13.24	6.117	6.117	5.949	4.632
13.22	7.06	7.06	6.106	6.946
13.19	7.17	7.46	7.04	8.99
13.17	7.03	7.19	7	2.982
13.17	6.713	7.07	6.579	7.98
13.17	6.721	6.836	6.428	2.912
13.22	7.14	7.16	6.508	5.043
13.24	7.84	7.84	7.08	8.14
13.22	7.24	8.06	6.747	10.91
13.17	6.675	7.26	6.675	5.321
13.17	6.628	6.757	6.327	7.94
13.17	7.05	7.09	6.645	3.923
13.17	7.03	7.07	6.827	6.524
13.15	7.05	7.19	6.974	8.75
13.08	6.71	7	6.634	9.86
13.08	6.701	6.786	6.62	7.45
13.06	6.935	6.958	6.621	8.6
13.06	7.3	7.43	6.9	10.53
13.1	7.6	7.61	7.3	6.905
13.15	7.35	7.68	7.35	8.39
13.15	7.03	7.35	6.882	8.76
13.15	7.01	7.05	6.874	9.84
13.13	6.768	7.02	6.73	8.28
13.1	6.854	6.971	6.771	8.92
13.08	6.285	6.9	6.285	7.76
13.06	5.334	6.272	5.334	7.98
12.99	5.314	5.331	5.275	8.34
12.93	5.202	5.349	5.19	7.79
12.9	5.084	5.21	5.061	9.27
12.84	5.064	5.151	5.01	8.13
12.75	5.075	5.091	4.981	9.76
12.66	5.059	5.132	5.039	12.19
12.57	5.62	5.686	5.026	10.76
12.46	5.296	5.733	5.276	10.15
12.33	5.106	5.333	5.01	11.41
12.17	4.931	5.139	4.745	13.68
11.97	5.095	5.106	4.85	11.68
11.91	5.995	5.995	5.108	10.24
11.88	6.612	6.614	6.005	14.63
11.84	7	7.02	6.619	15.57
11.84	7.31	7.33	6.985	17.68
11.86	7.56	7.56	7.32	16.3
11.95	6.731	7.69	6.682	12.86
12.08	6.996	7.28	6.809	13.84
12.13	6.656	6.985	6.656	17.24
12.15	6.787	6.799	6.465	18.65
12.1	6.888	6.955	6.705	17.59
12.1	6.741	6.934	6.648	14.14
12.15	6.402	6.792	6.357	12.54
12.22	5.93	6.455	5.907	12.7
12.26	5.582	5.99	5.487	12.65
12.28	5.473	5.548	5.415	13.92
12.33	5.667	5.667	5.409	13.35
12.35	5.831	5.844	5.658	12.24
12.37	6.086	6.125	5.795	9.23
12.41	5.8	6.092	5.8	11.39
12.41	4.799	5.771	4.799	12.99
12.37	4.203	4.764	4.203	9.87
12.3	3.875	4.27	3.869	9.48
12.24	3.606	3.916	3.538	8.27
12.13	3.598	3.616	3.38	7.63
12.04	4.817	4.866	3.592	6.602
12.06	5.889	5.928	4.69	8.55
12.1	6.056	6.141	5.728	7.22
12.15	6.374	6.394	6.008	7.58
12.22	7	7.23	6.296	7.48
12.28	7.06	7.4	6.947	7.45
12.35	6.896	7.06	6.894	6.536
12.46	6.449	6.893	6.411	5.927
12.5	6.209	6.521	6.209	8.69
12.48	5.997	6.237	5.997	9.29
12.46	6.11	6.11	5.959	10.19
12.44	6.405	6.405	6.058	8.84
12.39	5.954	6.405	5.954	7.65
12.39	5.53	5.974	5.522	10.4
12.39	5.473	5.525	5.332	9.58
12.39	5.509	5.537	5.371	8.16
12.37	5.365	5.666	5.343	10.84
12.35	4.953	5.365	4.953	8.68
12.3	4.365	4.946	4.365	10.02
12.24	3.704	4.346	3.704	7.24
12.15	3.247	3.701	3.245	8.86
11.99	2.976	3.259	2.968	10.34
11.82	2.877	3.052	2.877	10.09
11.64	3.596	3.596	2.833	14.59
11.49	3.488	3.652	3.339	13.34
11.44	4.8	4.8	3.47	15.86
11.44	5.092	5.109	4.804	12.91
11.47	5.253	5.256	4.899	14.76
11.51	5.273	5.319	5.142	13
11.55	5.254	5.496	5.243	12.37
11.6	4.882	5.324	4.729	10.79
11.64	4.579	5.029	4.579	13.86
11.62	4.094	4.662	4.094	14.67
11.77	4.057	4.111	4.016	18.46
11.58	3.857	4.074	3.846	14.29
11.49	3.775	3.883	3.762	12.52
11.44	3.641	3.796	3.635	11.98
11.4	3.771	3.83	3.651	14.74
11.38	3.195	3.755	3.188	10.58
11.36	3.016	3.228	3.016	10.61
11.36	2.752	3.034	2.743	9.57
11.33	2.433	2.753	2.433	9.3
11.27	2.268	2.426	2.186	7.83
11.25	2.172	2.296	2.035	7.81
11.22	2.376	2.376	2.141	7.78
11.2	2.847	2.847	2.387	10.13
11.18	2.973	3.023	2.86	7.81
11.16	2.856	3.065	2.856	9.08
11.14	3.287	3.381	2.866	8.23
11.18	3.769	4.02	3.112	11.11
11.29	4.704	4.859	3.755	9.5
11.49	5.403	5.784	4.507	10.92
11.71	6.076	6.56	5.345	11.29
11.88	5.936	6.555	5.828	10.74
12.04	5.787	6.177	5.769	11.59
12.19	4.954	5.808	4.954	9.21
12.28	4.642	5.026	4.584	9.08
12.35	3.995	4.664	3.995	8.11
12.35	3.733	4.023	3.612	8.23
12.35	3.664	3.797	3.605	9.39
12.37	3.67	3.706	3.6	7.65
12.37	3.698	3.74	3.614	7.88
12.37	3.385	3.691	3.385	5.977
12.35	2.955	3.387	2.934	7.69
12.35	2.93	2.937	2.758	6.433
12.33	2.852	2.934	2.734	6.664
12.3	2.606	2.896	2.606	5.477
12.3	2.649	2.698	2.581	6.186
12.26	2.43	2.763	2.414	8.64
12.22	2.515	2.535	2.322	5.904
12.17	2.25	2.523	2.221	5.974
12.13	2.468	2.546	2.241	4.171
12.08	1.831	2.476	1.675	3.922
12.04	2.325	2.536	1.685	4.494
11.99	3.455	3.455	2.307	5.73
11.99	4.536	4.634	3.338	6.367
12.08	5.682	5.682	4.499	4.956
12.19	5.224	5.705	4.988	5.326
12.3	5.041	5.298	4.874	4.412
12.39	4.577	4.997	4.453	5.535
12.41	4.017	4.595	4.017	5.289
12.41	3.886	4.023	3.882	5.01
12.44	3.895	4.225	3.847	6.975
12.41	3.777	4.005	3.67	4.931
12.41	3.356	3.829	3.356	5.475
12.41	2.942	3.419	2.942	0.956
12.44	2.684	2.963	2.452	2.561
12.44	2.476	2.911	2.078	1.7
12.44	2.463	2.62	2.113	2.321
12.44	1.362	2.544	1.209	4.073
12.39	1.63	1.785	1.119	5.593
12.37	1.019	1.638	1.003	5.561
12.33	1.296	1.298	0.907	3.32
12.26	1.988	1.988	1.123	3.59
12.19	1.758	2.101	1.484	5.285
12.15	2.054	2.34	1.746	2.605
12.1	2.849	2.865	1.865	3.266
12.08	2.596	2.859	2.265	4.016
12.04	3.036	3.198	2.596	4.619
11.99	3.679	3.829	2.851	3.467
11.99	3.829	4.217	3.722	5.637
11.97	4.023	4.167	3.852	7.32
11.97	4.239	4.451	3.971	5.633
11.95	4.135	4.233	4.093	7.76
11.95	4.138	4.184	4.076	7.31
11.91	4.336	4.347	4.142	9
11.82	4.303	4.37	4.264	7.31
11.77	4.137	4.301	4.112	7.54
11.77	4.26	4.26	4.096	7.77
11.77	4.458	4.458	4.207	9.04
11.73	4.339	4.474	4.339	9.32
11.66	4.205	4.331	4.178	8.7
11.64	4.48	4.492	4.154	6.987
11.64	4.529	4.631	4.475	7.56
11.62	4.5	4.567	4.441	8.46
11.64	4.286	4.487	4.274	8.8
11.62	4.114	4.294	4.098	8.9
11.6	3.881	4.135	3.881	6.994
11.58	4.038	4.07	3.835	6.741
11.6	3.998	4.167	3.948	5.377
11.64	4.133	4.253	3.934	6.67
11.66	4.152	4.445	3.997	7.72
11.69	4.617	4.66	4.075	7.12
11.71	4.505	4.751	4.316	7.44
11.77	4.321	4.711	4.166	8.37
11.84	3.866	4.366	3.702	8.88
11.91	3.717	3.989	3.545	6.04
11.93	3.123	3.583	3.123	5.878
11.93	2.632	3.266	2.594	7.64
11.91	2.343	2.648	2.339	5.798
11.86	2.231	2.369	2.061	4.168
11.8	2.114	2.44	2.002	6.236
11.75	1.962	2.274	1.962	4.55
11.71	1.71	2.009	1.441	2.997
11.66	0.936	1.787	0.821	3.952
11.6	0.784	1.123	0.699	0.697
11.58	0.665	0.862	0.524	1.324
11.53	0.602	0.847	0.504	1.444
11.49	0.926	0.994	0.532	2.972
11.44	0.738	1.137	0.706	1.708
11.4	0.82	0.883	0.453	0.649
11.38	0.573	0.939	0.553	1.581
11.33	0.408	0.73	0.214	2.356
11.27	0.491	0.509	0.148	2.04
11.22	1.339	1.398	0.145	2.158
11.2	3.112	3.112	1.324	1.268
11.31	5.399	6.055	3	2.527
11.51	5.708	6.749	4.709	2.506
11.75	6.346	6.707	5.065	2.929
11.97	4.965	6.322	4.818	4.773
12.15	4.913	5.446	4.913	3.445
12.3	4.383	5.008	4.383	3.592
12.41	3.782	4.374	3.782	3.494
12.48	3.421	3.771	3.418	3.404
12.5	3.395	3.732	3.211	2.834
12.48	3.238	3.356	2.921	2.064
12.46	1.712	3.275	1.712	3.517
12.41	1.173	1.73	1.149	2.629
12.39	0.584	1.351	0.584	2.476
12.33	0.605	0.85	0.539	0
12.3	-0.09	0.576	-0.09	4.387
12.24	-0.402	-0.078	-0.402	3.156
12.17	-0.757	-0.414	-0.757	3.042
12.08	-0.961	-0.729	-0.992	3.376
11.97	-1.06	-0.925	-1.079	3.589
11.86	-1.183	-1.058	-1.183	3.231
11.73	-1.267	-1.172	-1.28	4.106
11.6	-0.766	-0.766	-1.264	2.395
11.49	0.113	0.113	-0.813	2.671
11.42	3.081	3.128	0.122	1.977
11.47	4.68	4.931	2.738	2.485
11.62	6.679	6.679	4.434	2.128
11.86	7.75	8.71	6.116	1.803
12.08	7.47	8.93	6.924	3.896
12.26	6.65	8.13	6.559	6.222
12.41	5.664	6.898	5.663	3.651
12.55	4.796	5.798	4.639	4.575
12.61	4.287	5.015	4.15	3.19
12.64	3.89	4.3	3.802	3.677
12.66	3.571	3.909	3.551	3.057
12.64	2.898	3.569	2.89	3.333
12.61	2.501	2.997	2.501	3.033
12.59	2.495	2.776	2.447	3.477
12.59	2.252	2.681	2.252	5.094
12.57	1.922	2.468	1.799	4.466
12.55	1.426	2.042	1.426	2.994
12.5	1.162	1.449	0.734	4.008
12.44	1.011	1.209	0.705	4.329
12.35	1.107	1.396	0.929	4.783
12.28	1.941	2.137	1.184	4.377
12.22	2.947	2.947	1.976	3.514
12.17	3.372	3.664	2.838	3.459
12.13	5.046	5.046	3.395	3.658
12.1	6.274	6.274	5.038	6.584
12.13	6.69	6.69	6.264	8.44
12.13	7.89	7.89	6.707	11.33
12.15	8.34	8.47	7.75	10.78
12.24	8.22	8.51	8.18	7.46
12.35	7.26	8.23	7.26	8.57
12.41	6.545	7.23	6.545	7.3
12.46	6.171	6.585	6.144	8.49
12.46	5.964	6.166	5.94	5.445
12.5	5.987	6.119	5.925	5.093
12.5	5.553	5.977	5.553	5.212
12.48	5.381	5.569	5.357	5.495
12.44	5.374	5.411	5.249	5.176
12.41	5.607	5.653	5.376	5.787
12.39	6.143	6.16	5.648	7.45
12.39	6.179	6.292	6.122	8.36
12.41	6.368	6.378	6.159	10.19
12.41	6.27	6.37	6.24	7.38
12.41	6.335	6.442	6.233	7.8
12.39	6.517	6.564	6.26	9.08
12.39	7.03	7.03	6.501	7.72
12.39	6.689	7.11	6.677	10.22
12.39	6.648	6.68	6.476	7.52
12.41	6.745	6.799	6.613	10.15
12.41	7.42	7.42	6.756	9.38
12.41	8.34	8.34	7.46	9.88
12.46	9.04	9.07	8.35	9.12
12.5	9.69	9.69	9.01	9.27
12.57	9.91	9.91	9.67	5.476
12.66	11.3	11.3	9.91	9.38
12.73	11.02	11.34	10.99	7.53
12.84	10.91	11.09	10.83	10.22
12.88	10.41	10.99	10.4	10.7
12.99	9.98	10.39	9.94	10.14
12.95	9.45	9.96	9.43	6.218
12.95	8.96	9.45	8.96	6.423
12.97	8.92	8.97	8.75	7.39
12.95	8.48	8.95	8.46	9.11
12.93	8.45	8.49	8.36	11.28
12.93	8.15	8.51	8.14	9.84
12.95	8.04	8.26	8.04	6.408
12.95	7.99	8.17	7.98	10.52
12.9	7.49	8	7.49	6.624
12.93	7.11	7.51	7.1	3.992
12.95	7.26	7.34	7.08	4.081
12.95	6.809	7.43	6.809	4.843
12.93	7.34	7.37	6.818	5.144
12.93	8.15	8.15	7.32	4.876
12.93	9.9	9.9	8.2	4.089
13.01	10.15	10.75	9.68	10.8
13.13	9.64	10.19	9.05	6.971
13.26	10.9	10.99	9.67	5.539
13.42	10.88	11.12	10.85	8.85
13.55	9.62	10.93	9.62	11.02
13.66	9.3	9.6	9.29	9.79
13.73	9	9.29	8.97	7.8
13.8	8.51	9	8.51	6.976
13.82	8.91	8.91	8.44	6.92
13.87	9.29	9.32	8.93	9.07
13.89	8.93	9.3	8.93	10.32
13.89	9.16	9.16	8.87	9.11
13.91	9.81	9.87	9.18	9.31
13.93	10.09	10.09	9.78	8.47
13.96	10.3	10.32	10.09	7.74
14	10.59	10.62	10.29	8.9
14.02	10.84	10.85	10.6	9.93
14.07	11.24	11.24	10.8	10.3
14.11	11.68	11.68	11.23	6.945
14.18	11.97	11.98	11.67	8.63
14.23	12.51	12.51	11.94	8.73
14.29	12.36	12.53	12.34	9.05
14.36	12.65	12.65	12.35	8.38
14.45	13.52	13.52	12.67	10.11
14.54	14.22	14.22	13.53	10.48
14.65	15.37	15.38	14.21	11.46
14.84	14.99	15.49	14.98	11.07
15.03	14.58	15.09	14.56	10.26
15.21	14.52	14.6	14.5	7.69
15.35	14.15	14.52	14.15	5.59
15.48	13.46	14.15	13.46	6.014
15.58	13.05	13.44	13.04	5.419
15.67	12.9	13.09	12.87	5.395
15.71	12.97	13	12.89	5.956
15.78	13.05	13.07	12.97	7.59
15.83	12.89	13.06	12.89	5.43
15.87	12.96	12.97	12.81	6.316
15.9	12.7	13	12.7	5.42
15.92	12.56	12.75	12.5	5.868
15.94	12.71	12.91	12.56	6.249
15.92	13.33	13.36	12.73	12.87
15.9	13.04	13.3	13	8.17
15.9	12.41	13.04	12.36	8.9
15.87	11.96	12.41	11.92	5.459
15.83	11.49	12.07	11.47	7.91
15.78	11.8	11.8	11.37	4.341
15.78	11.93	12.18	11.58	6.505
15.81	12.46	12.74	11.72	9.05
15.83	13.43	13.43	12.44	9.99
15.92	13.55	13.73	13.3	13.27
16.04	13.51	13.69	13.28	14.28
16.15	13.04	13.59	13.04	13.55
16.24	13.3	13.31	12.99	14.83
16.27	13.36	13.38	13.3	23.3
16.18	12.71	13.31	12.7	17.18
16.08	12.3	12.72	12.3	16.72
16.01	11.8	12.28	11.8	11.79
15.99	11.3	11.82	11.3	8.96
15.97	10.48	11.3	10.48	7.93
15.9	9.71	10.5	9.7	9.46
15.81	8.95	9.69	8.95	8.28
15.71	8.41	8.93	8.41	6.682
15.62	7.72	8.45	7.72	4.96
15.58	7.76	7.79	7.65	5.952
15.48	7.83	7.83	7.68	7.07
15.39	7.72	8.14	7.72	7.79
15.3	8.06	8.1	7.58	8.04
15.19	8.9	8.9	8.11	10.52
15.05	9.56	9.57	8.93	11.99
14.91	9.77	9.81	9.56	14.88
14.78	10.19	10.2	9.79	13.86
14.67	10.81	10.81	10.23	14.27
14.58	11.33	11.34	10.81	16
14.51	10.94	11.35	10.94	16.71
14.49	10.6	10.91	10.49	17.93
14.47	11.08	11.1	10.61	19.29
14.43	11.21	11.27	11.09	19.24
14.36	11.16	11.3	11.11	16.98
14.34	11.45	11.45	11.17	17.98
14.34	11.81	11.91	11.4	18.67
14.36	11.79	11.81	11.46	15.8
14.38	11.49	11.83	11.45	15.19
14.45	11.69	11.7	11.44	14.96
14.49	11.57	11.88	11.57	14.34
14.53	11.74	11.74	11.5	15.12
14.56	11.86	11.89	11.66	15.79
14.6	11.98	12	11.86	17.32
14.62	12.26	12.3	11.97	17.22
14.67	12.6	12.61	12.21	18.66
14.71	12.79	12.81	12.34	20.43
14.73	12.72	12.87	12.67	16.43
14.75	12.85	12.94	12.73	18.61
14.78	12.69	12.86	12.62	18.39
14.82	12.89	12.93	12.67	17.14
14.89	13.24	13.26	12.89	17.34
14.93	13.46	13.46	13.16	19.72
15	13.48	13.57	13.38	17.35
15.05	13.34	13.57	13.3	18.28
15.12	12.94	13.39	12.94	14.2
15.19	13.19	13.19	12.9	15.78
15.25	13.59	13.59	13.18	15.24
15.3	13.4	13.64	13.31	15.37
15.32	12	13.42	12	15.27
15.35	10.92	12	10.92	12.44
15.35	10.34	10.89	10.33	11.36
15.32	9.99	10.32	9.99	14.35
15.3	9.7	9.98	9.7	10.45
15.25	9.12	9.68	9.12	12.51
15.21	8.47	9.17	8.44	14.21
15.12	7.61	8.45	7.59	10.07
15.07	6.822	7.57	6.822	10.02
15	6.119	6.796	6.119	7.59
14.91	5.434	6.107	5.434	5.937
14.8	4.63	5.424	4.63	6.803
14.64	4.284	4.615	4.284	6.819
14.49	4.132	4.283	4.059	7.24
14.32	4.087	4.144	4.028	7.95
14.14	4.473	4.473	4.066	6.43
14	5.846	5.846	4.457	7.13
13.91	7.82	7.91	5.887	7.87
13.87	8.74	8.83	7.73	11.33
13.82	9.09	9.21	8.59	13.17
13.87	9.57	9.73	8.92	14.34
13.91	9.72	9.94	9.52	14.12
13.98	9.43	9.8	9.43	11.46
14.02	8.94	9.48	8.94	11.98
14.02	8.53	8.94	8.49	11.07
13.98	8.47	8.52	8.41	13.75
13.93	8.72	8.74	8.45	13.25
13.84	9.07	9.1	8.66	15.52
13.8	9.66	9.66	9.08	17.58
13.73	10.02	10.09	9.67	16.86
13.66	10.04	10.04	9.78	18.89
13.64	10.25	10.25	10	18.07
13.62	10.67	10.71	10.26	18.53
13.62	11.01	11.01	10.68	17.54
13.64	11.31	11.35	11.02	18.03
13.69	11.01	11.35	11.01	17.37
13.73	11.21	11.4	11.03	15.77
13.78	11.72	11.73	11.22	19.52
13.78	11.74	11.87	11.7	19.78
13.8	11.37	12.08	11.37	22.24
13.8	12.06	12.07	10.73	22.41
13.82	12.08	12.17	11.97	20.11
13.84	12.25	12.26	11.94	18.27
13.91	11.87	12.24	11.87	20.12
13.98	11.54	11.88	11.54	17.87
14.07	11.62	11.62	11.25	16.03
14.16	11.77	11.83	11.66	17.48
14.18	11.88	11.88	11.72	17.11
14.2	12.15	12.22	11.87	17.06
14.25	12.02	12.2	12.02	17.1
14.27	12.24	12.25	12	21.29
14.29	12.05	12.34	12.03	17.15
14.36	12.15	12.28	12.09	19.25
14.38	11.93	12.2	11.88	21.37
14.4	11.94	12.05	11.86	23.23
14.38	11.56	11.93	11.49	19.47
14.38	11.59	11.71	11.5	18.82
14.41	11.66	11.74	11.55	20.13
14.45	10.19	11.77	10.19	13.92
14.47	9.86	10.19	9.82	10.28
14.49	8.95	9.88	8.95	17.2
14.45	9.07	9.2	8.76	13.43
14.4	8.81	9.06	8.74	12.25
14.32	8.54	8.82	8.54	12.47
14.25	7.99	8.52	7.99	11.42
14.18	8.01	8.05	7.91	15.93
14.11	7.32	8.11	7.24	17.84
14.11	8.18	8.19	7	11.37
14.2	7.71	8.28	7.48	16.97
14.27	8.16	8.37	7.65	16.29
14.29	8	8.64	7.84	16.42
14.27	7.52	7.96	7.52	10.46
14.23	7.06	7.58	7.06	12.45
14.07	6.389	7.04	6.386	10.94
13.93	5.911	6.372	5.908	11.73
13.78	5.991	6.015	5.901	12.06
13.66	6.044	6.068	5.933	10.98
13.6	5.806	6.034	5.806	9.97
13.48	5.331	5.799	5.331	9.19
13.39	5.235	5.331	5.147	7.2
13.33	5.392	5.405	5.232	7.11
13.28	5.331	5.49	5.331	5.972
13.22	5.605	5.63	5.297	6.63
13.19	6.068	6.068	5.645	7.51
13.15	6.32	6.352	6.067	3.936
13.15	6.459	6.504	6.244	4.761
13.13	6.905	6.905	6.466	5.793
13.13	6.483	6.966	6.436	5.076
13.13	7.01	7.04	6.484	6.401
13.15	8.35	8.35	7.02	8.49
13.15	10.41	10.41	8.37	12.6
13.13	11.75	11.75	10.42	14.91
13.17	13.13	13.14	11.77	14.03
13.3	13.79	13.81	13.12	16.78
13.48	13.62	13.79	13.62	16.14
13.64	13.63	13.68	13.52	15.44
13.8	13.66	13.8	13.62	16.28
13.96	13.6	13.71	13.59	19.26
14.09	13.48	13.66	13.44	16.3
14.23	13.29	13.54	13.29	17.65
14.36	13.21	13.35	13.18	14.92
14.47	13.31	13.33	13.2	17.17
14.58	13.12	13.32	13.1	14.27
14.69	13.1	13.17	13.09	15.06
14.8	12.96	13.11	12.94	17.04
14.87	12.74	12.97	12.74	15.77
14.93	11.89	12.74	11.88	14.14
14.96	12.33	12.33	11.8	17.27
14.93	12.4	12.46	12.3	16.55
14.91	12.51	12.56	12.41	16.47
14.89	12.34	12.54	12.33	17.36
14.82	12.1	12.33	12.08	16.4
14.8	12.38	12.41	12.1	19.52
14.78	12.69	12.69	12.38	19.69
14.8	13.1	13.1	12.69	20.27
14.84	13.41	13.41	13.06	17.5
14.91	14.06	14.06	13.29	18.25
15.03	14.25	14.37	14.13	18.25
15.16	14.35	14.4	14.2	19.53
15.23	14	14.48	14	16.19
15.3	13.75	14.02	13.72	20.95
15.32	13.68	13.94	13.66	23.91
15.35	12.68	13.67	12.67	19.36
15.32	11.94	12.68	11.94	22.76
15.23	11.22	11.93	11.22	18.93
15.16	10.8	11.2	10.78	17.65
15.05	10.37	10.77	10.37	20.54
14.91	10.29	10.38	10.23	19.32
14.8	10.1	10.27	10.04	15.7
14.73	9.91	10.1	9.91	15.73
14.69	9.51	9.87	9.51	13.28
14.62	9.44	9.51	9.39	13.03
14.54	9.54	9.54	9.38	14.33
14.45	9.81	9.81	9.5	15.2
14.34	9.78	9.84	9.73	14.81
14.25	9.62	9.8	9.61	15.49
14.23	8.21	9.62	8.06	12.59
14.2	8.64	8.79	8.02	14.04
14.23	9.93	9.98	8.72	16.91
14.34	10.08	10.46	9.8	16.7
14.43	10.08	10.43	9.74	19.24
14.45	9.92	10.39	9.77	20.26
14.49	9.55	9.99	9.41	15.81
14.58	8.74	9.55	8.71	13.94
14.62	8.19	8.75	8.15	12.79
14.62	7.45	8.18	7.44	11.71
14.55	6.896	7.45	6.896	12.35
14.42	6.648	6.894	6.648	11.1
14.32	6.161	6.649	6.161	11.68
14.23	5.666	6.159	5.666	10.43
14.07	5.489	5.672	5.484	10.1
13.98	5.185	5.504	5.184	10.7
13.91	5.179	5.227	5.101	12.53
13.8	4.938	5.182	4.891	10.37
13.73	4.525	4.996	4.518	9.18
13.62	3.887	4.505	3.887	8.28
13.42	3.65	3.944	3.645	11.86
13.19	3.642	3.642	3.458	8.77
13.01	4.289	4.289	3.635	14.07
12.84	4.663	4.669	4.305	13.02
12.68	5.799	5.828	4.682	17.34
12.61	6.523	6.526	5.845	14.63
12.66	7.13	7.25	6.556	15.03
12.75	8.2	8.27	7.19	11.27
12.86	8.34	8.39	7.95	14.37
12.97	8.91	9.23	8.3	12.82
13.1	9.16	9.38	8.88	13.67
13.22	8.4	9.29	8.4	9.38
13.28	7.93	8.38	7.93	7.54
13.33	7.59	7.99	7.59	7.71
13.44	7.29	7.62	7.26	9.16
13.35	6.785	7.31	6.785	9.13
13.3	6.339	6.778	6.337	8.35
13.28	5.96	6.419	5.96	7.22
13.24	5.082	5.953	5.055	6.499
13.17	4.963	5.175	4.914	7.72
13.1	5.402	5.402	4.981	9.89
13.01	5.773	5.773	5.421	10.46
12.9	6.24	6.24	5.784	10.9
12.81	6.61	6.61	5.837	10.49
12.73	8.2	8.2	6.635	13.31
12.66	9.2	9.2	8.21	15.76
12.7	9.34	9.34	9.14	12.92
12.77	10.1	10.1	9.33	10.01
12.86	11.01	11.01	10.11	12.7
12.97	11.86	11.86	11.04	14.31
13.1	12.62	12.62	11.9	10.98
13.28	13.33	13.33	12.6	11.91
13.48	13.94	14.17	13.34	14.95
13.73	14.01	14.15	13.76	14.75
13.96	13.86	14.33	13.86	13.2
14.14	13.36	13.86	13.36	9.12
14.27	12.55	13.35	12.55	8.45
14.36	12	12.59	12	6.672
14.45	11.37	11.97	11.37	8.66
14.49	11.01	11.35	10.99	8.79
14.56	10.98	11.03	10.96	6.391
14.61	11	11.04	10.95	8.29
14.63	11.24	11.25	11	10.08
14.67	11.36	11.41	11.2	12.89
14.69	11.22	11.36	11.21	10.59
14.75	10.86	11.21	10.86	9.98
14.76	10.57	10.87	10.57	7.31
14.75	10.71	10.74	10.54	7.5
14.78	10.65	10.85	10.65	11.53
14.78	10.31	10.62	10.17	10.94
14.75	10.59	10.62	10.27	8.58
14.78	10.66	10.69	10.57	9.17
14.73	9.85	10.66	9.82	10.07
14.71	10.73	10.77	9.89	12.95
14.69	11.26	11.26	10.71	12.94
14.66	10.86	11.27	10.86	13.34
14.69	11.01	11.01	10.31	13.73
14.69	11	11.09	10.92	14.79
14.69	11.04	11.26	10.95	14.31
14.69	11.04	11.12	10.93	12.45
14.69	10.85	11.03	10.84	12.13
14.69	10.84	10.86	10.64	15.26
14.69	10.63	10.85	10.59	14.62
14.69	10.33	10.63	10.28	17.55
14.67	10.07	10.31	10.07	14.32
14.67	10.29	10.29	10.08	15.35
14.67	10.61	10.63	10.29	13.52
14.67	10.34	10.61	10.34	10.58
14.69	10.13	10.39	10.12	12.97
14.71	10.05	10.27	10.05	10.58
14.73	9.99	10.11	9.78	10.34
14.78	10.27	10.28	10.02	10.47
14.78	10.28	10.34	9.96	10.85
14.78	10.55	10.56	10.3	11.66
14.75	10.25	10.54	10.17	10.78
14.73	10.7	10.74	10.28	13.55
14.68	11.06	11.08	10.64	14.86
14.66	11.41	11.48	11.01	21.14
14.64	11.66	11.68	11.4	20.96
14.64	12.02	12.02	11.65	19.36
14.67	12.26	12.28	12.05	20.77
14.69	12.35	12.37	12.27	22.3
14.71	12.67	12.67	12.32	22.91
14.73	12.58	12.73	12.52	20.48
14.73	12.28	12.6	12.28	23.17
14.76	11.81	12.3	11.67	19.07
14.76	10.14	11.81	10.1	22.06
14.71	10.1	10.36	10	18.11
14.67	10.14	10.19	10.01	18.51
14.62	9.71	10.31	9.69	18.92
14.56	7.19	9.74	7.18	12.04
14.54	6.72	7.28	6.72	7.54
14.49	6.865	6.865	6.656	9.15
14.36	7.46	7.51	6.876	12.93
14.2	7.23	7.44	7.22	12.31
14.07	6.717	7.19	6.717	9.38
14	6.584	6.73	6.481	9.54
13.89	6.212	6.577	6.212	10.43
13.75	5.811	6.207	5.811	9.42
13.6	6.705	6.705	5.819	13.21
13.42	8.02	8.02	6.738	19.47
13.24	9.01	9.07	8.01	17.04
13.17	9.2	9.34	8.96	15.33
13.17	9.6	9.7	9.04	16.85
13.19	9.53	10.35	9.53	15.25
13.24	9.63	9.67	9.37	18.6
13.26	9.5	9.7	9.5	19.5
13.26	9.11	9.49	9.11	16.76
13.26	8.03	9.14	8.03	15.68
13.26	7.83	8	7.69	15.74
13.24	8.19	8.26	7.72	20.86
13.17	8.39	8.4	7.93	22.34
13.17	9.75	9.75	8.33	17.92
13.22	8.07	10.22	7.1	20.2
13.13	9.39	10.83	8.29	24.6
13.06	8.39	9.27	8.3	11.72
13.06	9.44	9.45	8.46	17.79
13.01	8.82	9.56	8.8	14.84
12.97	8.49	8.75	8.29	17.8
12.86	8.17	8.57	8.17	12.67
12.77	8.07	8.36	8.07	16.13
12.66	7.86	8.06	7.7	17.59
12.55	7.98	8.01	7.75	19.08
12.39	8.45	8.47	8.01	21.38
12.26	9.08	9.1	8.46	22.9
12.17	9.41	9.44	9.01	22.99
12.17	9.74	9.87	9.38	25.38
12.19	8.43	9.97	8.42	26.2
12.22	9.21	9.21	8.25	22.16
12.22	9.66	9.79	8.99	26.28
12.17	9.19	9.77	8.84	26.17
12.15	8.93	9.2	8.88	26.85
12.13	9.21	9.27	8.8	23.76
12.15	9.35	9.52	9.02	23.08
12.19	8.54	9.35	8.54	22.59
12.17	7.73	8.52	7.73	19.3
12.1	7.44	7.72	7.44	16.46
12.06	7.31	7.56	7.26	13.72
12.04	6.891	7.32	6.891	13.72
11.97	6.468	6.878	6.468	11
11.99	6.396	6.45	6.249	12.77
11.97	6.256	6.417	6.133	12.33
11.93	5.772	6.253	5.772	8.11
11.97	5.633	5.803	5.549	3.912
12.02	5.815	6.02	5.656	4.982
12.04	6.399	6.399	5.811	6.994
12.06	6.208	6.54	6.208	5.455
12.08	6.056	6.2	5.915	5.155
12.1	6.117	6.162	6.051	7.46
12.1	6.105	6.286	6.021	8.65
12.15	6.23	6.23	6.023	9.74
12.19	7.3	7.3	6.21	9.95
12.33	8.02	8.02	6.812	12.09
12.5	7.88	8.23	7.65	13.21
12.59	7.52	7.87	7.21	10.52
12.64	7.06	7.6	7.06	11.89
12.59	5.224	7.06	5.157	13.39
12.53	4.622	5.506	4.602	13.74
12.46	5.012	5.012	4.6	13.83
12.35	5.011	5.057	4.958	10.89
12.26	5.119	5.239	5.003	14.55
12.1	4.939	5.098	4.939	12.84
12.02	5.278	5.278	4.91	12.55
12.02	5.333	5.486	5.242	9.54
11.99	5.876	5.876	5.322	12.61
11.97	6.187	6.294	5.916	14.75
11.99	5.844	6.225	5.844	11.98
11.95	5.251	5.831	5.251	12.11
11.93	5.125	5.258	5.096	10.22
11.91	5.547	5.588	5.101	11.18
11.88	5.736	5.877	5.541	10.03
11.91	5.759	5.865	5.72	8.86
11.93	6.282	6.292	5.651	10.13
11.95	6.596	6.596	6.295	9.79
12.02	7.2	7.56	6.578	6.64
12.1	7.97	7.97	7.1	5.554
12.19	8.62	8.62	7.65	7.07
12.3	9.05	9.3	8.57	8.57
12.46	8.85	9.17	8.57	6.931
12.59	8.31	8.92	8.31	9.49
12.66	7.79	8.29	7.79	9.56
12.7	7.33	7.8	7.33	8.29
12.73	6.63	7.38	6.608	5.839
12.7	5.91	6.594	5.91	5.321
12.7	5.497	5.899	5.491	5.227
12.68	5.229	5.489	5.228	5.776
12.66	4.374	5.237	4.374	3.695
12.61	3.839	4.374	3.795	4.158
12.59	3.485	3.857	3.465	5.702
12.53	3.212	3.493	3.184	3.578
12.46	2.885	3.195	2.823	4.555
12.39	2.773	2.903	2.721	4.19
12.33	2.149	2.728	2.149	3.373
12.26	1.819	2.129	1.808	3.167
12.19	1.856	1.856	1.745	2.904
12.1	2.155	2.223	1.852	2.567
12.04	4.285	4.285	2.21	0.646
12.06	6.33	6.33	4.429	1.251
12.22	7.3	7.43	5.985	4.871
12.39	7.04	8.01	6.673	6.483
12.64	7.96	8.52	7.11	6.003
12.88	8.04	8.82	7.59	6.893
13.1	8.57	8.57	7.79	5.446
13.33	7.8	8.58	7.8	3.793
13.46	7.6	7.76	7.52	3.241
13.55	7.3	7.75	7.26	3.404
13.6	6.308	7.28	6.308	4.284
13.62	5.691	6.348	5.668	4.769
13.62	5.53	5.712	5.463	5.212
13.62	5.258	5.536	5.194	3.885
13.57	4.962	5.271	4.952	4.462
13.55	4.583	5.035	4.583	2.357
13.51	4.72	4.749	4.399	2.367
13.46	4.723	4.852	4.567	1.899
13.37	3.861	4.735	3.852	6.014
13.3	3.991	4.094	3.827	7.28
13.24	4.241	4.302	3.887	4.968
13.19	4.444	4.444	4.154	6.561
13.15	4.641	4.911	4.398	8.13
13.08	5.48	5.48	4.485	7.01
13.04	5.552	6.076	5.334	10.13
12.99	5.233	5.731	5.051	10.19
12.97	5.121	5.442	5.112	10.53
12.99	5.349	5.578	5.058	9.3
13.04	5.236	5.529	5.118	8.27
13.06	5.391	5.662	5.284	9.89
13.1	5.651	6.014	5.303	10.37
13.15	5.662	6.044	5.662	11.57
13.17	5.724	5.765	5.491	8.4
13.17	5.847	5.962	5.616	6.898
13.17	5.619	5.919	5.619	6.283
13.17	6.081	6.081	5.573	4.377
13.17	5.485	6.07	5.357	5.407
13.17	5.364	5.608	5.364	6.15
13.17	4.917	5.367	4.862	6.207
13.15	4.599	5.04	4.526	6.3
13.13	4.221	4.76	4.164	5.203
13.1	3.786	4.294	3.636	5.539
13.06	3.605	3.752	3.35	8.38
13.01	3.705	3.885	3.513	8.24
12.97	3.727	3.919	3.565	10.85
12.93	3.743	4.04	3.651	11.75
12.88	3.812	3.89	3.591	11.23
12.84	4.237	4.397	3.796	13.26
12.79	4.695	4.714	4.222	13.62
12.75	4.499	4.804	4.497	15.77
12.68	4.496	4.703	4.475	14.78
12.66	4.946	5.064	4.514	12.44
12.64	4.829	5	4.714	12.14
12.64	5.242	5.251	4.822	10.06
12.61	5.236	5.466	5.188	8.93
12.59	5.091	5.253	5.026	9.42
12.57	5.018	5.33	4.866	8.52
12.55	4.918	5.19	4.876	8.77
12.53	4.708	5.03	4.691	8.25
12.55	4.581	4.874	4.559	8.8
12.57	4.478	4.757	4.44	10.22
12.55	4.597	4.672	4.383	6.422
12.57	4.481	4.807	4.437	6.741
12.59	4.525	4.642	4.375	6.983
12.59	4.468	4.592	4.3	6.014
12.61	4.263	4.527	4.132	6.446
12.64	4.095	4.39	4.095	6.349
12.64	4.046	4.346	3.986	6.945
12.64	3.717	4.183	3.717	8.09
12.59	3.514	3.824	3.398	8.87
12.5	3.753	3.899	3.494	10.41
12.44	4.279	4.551	3.759	7.58
12.39	5.573	5.594	4.256	8.18
12.41	5.595	5.845	5.273	10.99
12.46	6.076	6.383	5.592	12.73
12.5	6.61	6.707	5.951	11.72
12.57	6.431	6.61	6.235	12.66
12.66	6.548	6.712	6.061	7.38
12.75	5.582	6.432	5.492	11.14
12.86	5.089	5.712	5.089	12.91
12.9	4.606	5.167	4.57	10.48
12.9	4.105	4.607	4.057	10.74
12.86	3.722	4.128	3.687	11.21
12.81	3.68	3.792	3.62	11.12
12.75	3.108	3.708	3.108	11.14
12.73	2.85	3.438	2.757	8.53
12.68	2.332	2.803	2.332	6.814
12.64	2.17	2.4	2.17	7.58
12.57	1.909	2.157	1.876	8.03
12.53	1.771	2.034	1.653	11.48
12.46	1.656	1.943	1.656	8.78
12.37	1.761	1.761	1.552	8.19
12.28	1.766	1.808	1.706	8.44
12.22	1.852	1.899	1.669	9.33
12.15	2.539	2.572	1.853	8.37
12.06	2.966	2.966	2.528	10.75
12.02	3.648	3.707	2.893	12.26
12.04	4.468	4.546	3.562	13.33
12.15	5.173	5.551	4.422	12.85
12.33	6.043	6.332	5.245	13.06
12.48	5.961	6.495	5.771	12.23
12.61	6.422	6.867	5.987	10.44
12.75	6.327	6.592	6.204	9.26
12.84	6.162	6.51	6.128	8.21
12.9	5.663	6.155	5.652	6.885
12.95	5.146	5.653	5.146	6.778
12.97	4.736	5.13	4.736	8.47
12.97	4.314	4.738	4.214	7.53
12.95	3.843	4.327	3.843	7.33
12.9	3.449	3.871	3.4	4.534
12.88	3.402	3.544	3.352	5.814
12.84	3.009	3.386	2.996	5.712
12.79	2.752	3.103	2.713	4.793
12.7	2.354	2.728	2.314	4.468
12.64	1.797	2.332	1.795	3.165
12.57	1.296	1.995	1.287	0.895
12.46	1.14	1.457	1.106	2.116
12.37	0.336	1.264	0.315	2.517
12.28	0.357	0.503	0.274	3.616
12.17	1.227	1.306	0.363	2.813
12.13	3.082	3.156	1.301	2.174
12.15	5.898	5.936	3.332	4.306
12.24	7.13	7.13	5.19	5.874
12.41	6.662	7.27	6.217	8.91
12.61	7.59	7.87	6.755	9.62
12.79	7.5	7.8	7.21	10.5
12.99	7.18	7.83	7.05	11.77
13.13	6.457	7.23	6.457	9.26
13.24	5.742	6.462	5.721	8.75
13.28	5.267	5.758	5.253	5.813
13.51	4.561	5.223	4.558	4.516
13.33	4.373	4.671	4.247	3.388
13.26	3.742	4.325	3.711	6.014
13.17	3.54	3.768	3.419	4.84
13.08	3.71	3.866	3.542	4.391
13.01	3.905	4.025	3.643	5.109
12.93	3.911	4.118	3.488	5.585
12.84	3.626	3.91	3.626	6.178
12.75	3.62	3.724	3.501	4.426
12.68	4.183	4.286	3.616	5.672
12.61	4.416	4.537	3.875	6.445
12.53	4.308	4.504	4.253	4.836
12.44	4.15	4.303	3.828	6.338
12.33	5.503	5.503	4.166	7.78
12.26	5.808	5.843	5.495	9.8
12.19	5.961	6.161	5.728	10.97
12.15	6.926	6.926	5.907	8.96
12.19	6.518	6.871	6.426	10.7
12.24	6.333	6.526	6.256	8.89
12.3	6.377	6.486	6.253	8.41
12.35	6.309	6.455	6.271	7.26
12.37	6.005	6.371	6.005	7.64
12.41	5.848	6.072	5.848	4.173
12.44	5.349	5.832	5.337	4.034
12.46	5.023	5.318	5.01	5.666
12.46	4.878	5.131	4.878	6.89
12.44	4.662	4.941	4.63	8.31
12.41	4.672	4.736	4.628	6.197
12.39	4.646	4.718	4.587	7.09
12.35	4.302	4.69	4.302	10.32
12.26	4.15	4.367	4.064	8.03
12.22	4.204	4.205	4	7.03
12.22	4.003	4.329	3.978	5.959
12.22	3.851	4.081	3.634	7.28
12.19	4.062	4.135	3.854	7.21
12.19	4.181	4.195	4.013	5.851
12.19	4.489	4.489	4.101	5.338
12.17	4.745	4.745	4.368	6.206
12.15	4.895	5.122	4.377	6.366
12.17	5.518	6.164	4.82	8.42
12.26	6.58	7.1	5.531	5.749
12.39	7.45	7.45	6.368	6.427
12.61	8.23	8.23	6.814	5.584
12.86	7.96	8.59	7.35	6.335
13.06	7.84	8.63	7.37	5.998
13.24	7.47	8.1	7.38	6.561
13.35	7.01	7.63	7	6.275
13.42	6.652	7.08	6.652	3.948
13.44	5.762	6.607	5.752	4.362
13.42	5.016	5.767	5.012	4.595
13.37	4.464	5.004	4.464	6.014
13.3	3.916	4.439	3.899	5.306
13.24	3.541	3.917	3.526	5.885
13.17	3.079	3.551	3.079	4.846
13.1	2.751	3.108	2.751	4.344
13.01	2.574	2.738	2.52	4.769
12.93	2.152	2.585	2.15	5.314
12.84	2.028	2.178	2.015	5.488
12.75	2.348	2.348	2.009	5.265
12.64	2.327	2.346	2.172	3.293
12.55	2.744	2.744	2.306	3.569
12.46	4.569	4.569	2.776	3.53
12.39	6.178	6.178	4.541	7.94
12.33	7.82	7.84	6.238	11.4
12.33	8.35	8.95	7.63	11.6
12.46	8.75	9.09	8.41	13.19
12.59	9.46	9.54	8.74	12.47
12.77	9.66	9.94	9.2	11.51
12.93	8.65	9.85	8.6	14.9
13.04	8.25	8.73	8.14	11.26
13.1	8.11	8.26	8.08	12.4
13.15	8.02	8.14	7.99	15
13.15	8.26	8.27	8.04	14.13
13.15	8.45	8.45	8.22	13.34
13.17	8.92	8.93	8.44	13.4
13.17	9.39	9.39	8.88	12.5
13.22	9.85	9.85	9.4	12.95
13.24	10.17	10.17	9.85	13.31
13.26	10.01	10.43	10.01	11.15
13.3	10.39	10.42	9.87	12.5
13.35	10.33	10.47	10.33	11.49
13.39	9.89	10.32	9.89	12.71
13.42	9.79	9.97	9.75	10.52
13.42	9.68	9.82	9.61	11.55
13.37	9.67	9.74	9.59	11.01
13.35	10.05	10.05	9.66	11.74
13.33	11.02	11.03	10.05	13.07
13.35	11.63	11.63	11.02	18.72
13.42	11.69	11.93	11.6	13.34
13.48	11.18	11.66	11.18	14.98
13.55	10.7	11.17	10.34	13.65
13.62	11	11	10.73	16.59
13.69	11.31	11.31	11	14.76
13.73	12.04	12.04	11.32	16.44
13.8	12.31	12.44	12.03	18.43
13.91	12.68	12.72	12.29	21.68
14	12.65	12.95	12.52	19.06
14.09	12.82	12.86	12.6	20.33
14.16	12.93	12.95	12.75	22.96
14.25	12.91	12.96	12.85	15.42
14.32	13.02	13.11	12.93	15.4
14.41	13.02	13.09	12.94	17.5
14.47	12.71	13.04	12.71	15.34
14.54	12.19	12.73	12.19	11.05
14.62	11.87	12.18	11.71	11.55
14.67	11.57	11.89	11.57	13.14
14.69	11.78	11.78	11.54	13.71
14.69	12.17	12.17	11.78	13.48
14.71	12.73	12.73	12.2	16.44
14.73	12.98	13	12.73	16.17
14.76	13.12	13.12	12.98	14.73
14.78	13.19	13.34	13.11	14.06
14.84	13.71	13.71	13.18	20.14
14.91	14.29	14.29	13.72	21.8
14.98	14.64	14.66	14.29	22.44
15.09	15.17	15.24	14.69	18.14
15.23	14.75	15.17	14.59	19.89
15.35	14.99	15.06	14.79	18.74
15.44	13.99	14.99	13.99	17.64
15.51	13.35	13.98	13.34	19.53
15.53	13.2	13.37	13.13	17.25
15.53	12.82	13.22	12.82	15.67
15.53	12.55	12.84	12.53	15.46
15.53	12.41	12.53	12.28	17.63
15.48	12.61	12.63	12.41	16.8
15.48	12.01	12.63	11.9	15.1
15.48	11.67	12.07	11.67	13.15
15.46	11.3	11.65	11.24	12.59
15.46	11.47	11.48	11.3	11.79
15.46	11.49	11.56	11.41	11.84
15.46	9.9	11.48	9.81	10.1
15.48	8.82	9.97	8.82	10.48
15.48	8.9	9.02	8.56	6.81
15.46	8.95	9.12	8.75	5.284
15.41	8.76	8.99	8.6	9.58
15.39	8.14	8.84	7.88	8.14
15.37	8.33	8.58	8.11	8.93
15.32	8.92	8.92	8.39	7.25
15.3	9.17	9.54	8.92	7.82
15.3	8.95	9.38	8.82	10.41
15.3	9.05	9.48	8.85	8.52
15.32	8.88	9.74	8.87	9.25
15.32	8.63	8.92	8.54	6.186
15.28	8.45	8.64	8.36	6.709
15.23	8.15	8.47	8.13	6.856
15.19	7.98	8.19	7.98	6.373
15.14	7.7	8.13	7.7	5.039
15.09	7.37	7.73	7.35	4.117
15.05	6.766	7.38	6.766	5.274
15.03	6.423	6.951	6.385	6.049
15	6.066	6.492	6.066	5.696
14.96	6.004	6.239	5.911	4.55
14.93	6.083	6.083	5.858	6.36
14.91	5.891	6.076	5.848	6.023
14.84	5.887	6.035	5.788	7.06
14.78	5.455	5.837	5.399	6.526
14.71	5.772	5.796	5.45	7.55
14.67	6.668	6.91	5.764	6.269
14.69	7.14	7.38	6.529	7.08
14.71	7.44	8.19	6.912	7.68
14.78	8.16	8.16	7.27	7.25
14.87	8.44	8.93	7.84	8.81
15	9.18	9.36	8.12	5.924
15.16	8.3	9.23	8.18	6.067
15.35	8.73	9.63	8.37	7.15
15.48	8.24	9.41	8.17	7.73
15.58	8.05	8.39	7.94	4.65
15.62	7.26	8.1	7.26	5.166
15.58	6.748	7.4	6.74	4.197
15.51	6.49	6.975	6.49	1.748
15.44	6.457	6.634	6.316	1.738
15.37	5.549	6.395	5.314	1.099
15.28	5.111	5.709	5.037	2.051
15.14	4.197	5.098	4.153	0.033
15.07	3.936	4.27	3.728	2.098
14.98	3.552	3.996	3.264	2.547
14.91	3.344	3.627	3.344	2.799
14.8	2.706	3.36	2.672	2.983
14.69	2.415	2.875	2.219	2.622
14.58	2.193	2.404	1.89	2.283
14.45	2.751	2.751	2.053	1.845
14.34	4.268	4.268	2.762	0.881
14.27	6.266	6.266	4.242	2.38
14.29	8.07	8.07	6.314	3.255
14.43	8.42	8.7	6.934	4.227
14.64	7.77	8.86	6.621	6.781
14.87	7.37	9.2	6.89	5.08
15.09	7.33	10.01	6.913	5.792
15.3	7.96	8.35	7.28	5.608
15.48	7.43	8.77	7	4.71
15.58	6.565	7.53	6.565	4.331
15.62	6.408	6.709	6.305	5.333
15.62	5.89	6.404	5.89	6.384
15.55	5.495	6.031	5.495	4.627
15.48	4.954	5.627	4.895	2.557
15.37	5.079	5.391	4.802	0.08
15.3	4.008	5.131	4.008	2.707
15.25	2.689	4.043	2.689	3.532
15.16	1.921	2.657	1.921	4.053
15.05	1.505	1.919	1.505	3.89
14.93	1.113	1.54	1.101	4.975
14.8	1.475	1.488	1.036	5.051
14.65	1.274	1.556	1.258	4.696
14.49	1.451	1.468	1.124	4.49
14.36	1.786	1.891	1.407	6.191
14.23	2.546	2.65	1.742	6.357
14.11	3.083	3.587	2.418	5.011
14.07	3.795	3.86	2.623	3.202
14.07	4.178	4.381	3.54	4.793
14.11	5.534	5.73	4.152	3.595
14.2	5.839	5.989	5.039	3.953
14.29	5.643	5.808	5.19	4.427
14.38	5.723	6.197	5.283	4.678
14.45	5.679	5.876	5.447	4.542
14.47	5.388	5.844	5.299	4.459
14.76	5.189	5.512	5.12	2.111
14.49	5.02	5.278	5.02	2.428
14.36	4.449	5.096	4.449	0.448
14.27	3.337	4.667	3.337	3.273
14.16	3.114	3.402	2.892	0.851
14.05	3.076	3.157	2.492	1.279
13.91	2.917	3.292	2.6	0.075
13.82	3.07	3.07	2.629	0.955
13.78	3.224	3.224	2.718	1.866
13.71	3.115	3.785	3.036	4.007
13.66	2.992	3.23	2.824	2.395
13.6	2.657	3.038	2.562	2.554
13.51	2.861	3.086	2.57	3.272
13.44	2.926	3.017	2.41	3.827
13.35	3.355	3.601	2.691	5.698
13.3	4.772	4.772	3.323	4.909
13.26	5.2	6.228	4.427	8.47
13.28	6.617	7.2	5.228	7.36
13.42	8.42	8.71	6.515	6.999
13.62	7.54	8.41	7.03	9.38
13.75	6.826	8.15	6.785	10.73
13.87	6.352	7.14	6.352	11.02
13.96	6.184	6.578	6.035	10.62
14	5.767	6.204	5.757	8.88
14.02	5.853	6.055	5.744	9
14.05	5.951	6.205	5.754	6.722
14.07	5.631	6.015	5.631	8.82
14.09	5.5	5.823	5.5	6.696
14.09	5.556	5.585	5.322	7.37
14.07	5.355	5.677	5.211	6.396
14.07	5.077	5.513	5.005	6.73
14.05	4.866	5.613	4.866	3.252
14.02	4.77	5.07	4.646	4.128
13.98	4.14	4.886	4.134	5.624
13.91	4.248	4.726	4.162	4.251
13.87	4.117	4.589	4.008	6.178
13.8	4.344	4.488	3.883	10.03
13.71	4.546	4.747	4.292	10.23
13.64	4.692	4.996	4.512	10.06
13.57	5.135	5.166	4.59	10.42
13.55	5.527	5.945	5.006	9.5
13.51	5.766	5.766	5.364	10.38
13.48	5.936	6.289	5.619	14.5
13.46	5.91	6.141	5.608	14.52
13.44	5.801	6.165	5.693	13.39
13.42	5.798	5.932	5.582	11.82
13.39	5.775	5.927	5.642	9.06
13.37	5.351	5.89	5.343	13.35
13.3	5.134	5.4	5.091	12.27
13.24	4.826	5.217	4.53	10.01
13.15	4.286	4.76	4.229	10.85
13.08	4.084	4.426	4.084	12.07
13.01	4.268	4.364	4.159	11.97
12.97	4.429	4.597	4.217	9.98
12.93	4.335	4.537	4.217	9.09
12.88	4.12	4.54	4.088	9.4
12.84	3.984	4.098	3.844	9.48
12.81	3.914	4.033	3.706	10.49
12.79	3.739	4.038	3.669	10.26
12.75	3.698	3.861	3.618	8.79
12.68	4.173	4.209	3.675	9.92
12.64	4.24	4.579	4.152	10.36
12.59	4.555	4.662	4.11	9.75
12.55	4.809	4.922	4.556	11
12.55	5.714	5.994	4.649	10.05
12.55	6.518	6.649	5.697	12.73
12.59	6.944	7.37	6.427	14.21
12.66	7.3	7.93	6.931	14.62
12.75	7.42	8.25	7.18	14.17
12.86	7.28	7.96	7.28	10.46
12.97	6.856	7.44	6.731	12.07
13.01	6.328	6.798	6.234	9.01
13.01	5.748	6.395	5.576	8.34
12.99	4.867	5.709	4.847	10.07
12.97	4.898	5.031	4.772	10.14
12.95	5.084	5.274	4.862	9.37
12.9	5.404	5.404	4.996	7.08
12.9	4.725	5.285	4.725	9.07
12.88	4.139	4.819	4.107	8.67
12.86	3.672	4.248	3.635	7.8
12.84	3.29	3.77	3.184	4.814
12.79	3.152	3.371	2.928	5.464
12.75	3.259	3.538	3.066	6.695
12.7	2.632	3.36	2.501	5.738
12.64	2.763	2.994	2.52	4.126
12.59	3.6	3.6	2.747	4.919
12.55	4.759	5.077	3.415	5.963
12.59	6.181	6.807	4.738	6.49
12.75	7.05	8.62	6.181	4.752
12.97	8.29	9.88	6.837	5.113
13.3	9.05	9.36	7.62	4.461
13.62	9.25	9.99	8.08	2.677
13.96	9.31	10.13	8.37	3.581
14.25	9.1	10.1	8.71	2.93
14.47	8.56	9.35	8.17	3.581
14.61	8.08	8.74	7.84	5.764
14.67	7.53	8.18	7.42	5.075
14.69	6.656	7.51	6.587	7.67
14.69	6.607	6.862	6.583	7.12
14.64	6.398	6.695	6.388	7.03
14.62	6.073	6.486	6.073	7.99
14.51	5.612	6.12	5.448	10.47
14.38	5.124	5.802	5.124	12.65
14.25	5.082	5.19	5.038	9.42
14.14	5.061	5.149	4.958	9.02
14	5.585	5.585	5.087	7.77
13.89	6.281	6.281	5.577	12.19
13.73	6.842	6.842	6.293	12.58
13.62	7.45	7.45	6.86	13.64
13.51	8.03	8.03	7.41	13.32
13.46	8.98	8.98	8.04	12.91
13.44	9.8	9.8	9.02	12.05
13.42	10.42	10.44	9.81	14.75
13.42	10.63	10.63	10.37	14.36
13.39	11.31	11.32	10.63	15.78
13.44	12.01	12.09	11.3	12.41
13.55	12.89	12.89	12.02	13.85
13.69	13.14	13.36	12.91	17.84
13.8	12.48	13.12	12.48	22.95
13.89	11.86	12.45	11.86	16.46
13.96	11.17	11.84	11.17	18.26
13.93	10.63	11.15	10.63	15.77
13.89	10.24	10.66	10.24	14.81
13.87	9.78	10.24	9.78	15.89
13.8	9.41	9.79	9.4	14.06
13.75	8.93	9.41	8.93	14.64
13.69	8.58	8.91	8.52	15.56
13.6	8.26	8.68	8.26	18.49
13.53	6.632	8.21	5.913	12.79
13.55	6.461	6.667	6.461	11.77
13.53	6.169	6.446	6.169	11.74
13.39	5.475	6.137	5.475	12.45
13.24	5.086	5.506	5.066	11.57
13.04	4.779	5.094	4.578	12.34
12.81	5.39	5.627	4.824	17.66
12.53	5.451	5.991	5.319	15.99
12.3	4.305	5.474	4.186	11.63
12.24	4.889	4.889	3.777	13.18
12.1	5.379	5.648	4.914	24.6
12.1	6.435	6.435	5.23	20.11
12.17	7.36	7.36	6.47	23.99
12.24	6.837	7.54	5.887	19.6
12.35	6.477	6.951	6.477	14.23
12.39	6.46	6.563	6.317	12.71
12.41	6.224	6.477	6.224	10.11
12.35	6.045	6.437	6.045	13.8
12.3	6.026	6.041	5.877	14.39
12.26	6.219	6.353	6.015	14.37
12.24	6.784	6.797	6.25	15.03
12.22	6.82	7.03	6.778	18.78
12.22	6.449	6.876	6.449	13.92
12.24	6.746	6.802	6.259	14.75
12.26	6.703	6.944	6.588	17.61
12.28	5.91	6.818	5.902	15.39
12.3	5.56	5.899	5.492	12.51
12.3	5.077	5.512	5.013	11.68
12.33	4.457	5.051	4.453	13.32
12.33	4.331	4.473	4.22	8.17
12.3	4.79	4.904	4.192	7.6
12.37	6.138	6.365	4.613	7.47
12.5	7.35	7.43	5.812	7.44
12.75	7.86	8.68	7.09	7.03
13.04	8.07	8.58	7.36	8.93
13.33	8.38	9.13	7.84	9.86
13.57	8.97	9.57	8.44	10.37
13.8	8.91	8.95	8.3	6.594
13.96	8.36	8.86	8.33	8.95
14	8.4	8.58	8.34	6.24
14.07	7.75	8.38	7.74	9.16
14.07	7.26	7.75	7.25	9.12
14.05	7.01	7.27	6.988	8.86
14.02	7.18	7.19	7	10.06
13.98	7.24	7.26	7.03	13.47
13.93	7.14	7.24	7.01	11.22
13.89	7.67	7.67	7.14	10.67
13.82	7.6	7.91	7.6	10.37
13.75	6.059	7.58	6.059	14.15
13.73	5.501	6.074	5.425	12.17
13.69	4.75	5.492	4.75	11.49
13.6	3.869	4.748	3.869	8.26
13.46	3.226	3.864	3.226	9.09
13.26	3.311	3.311	3.125	8.73
13.1	4.02	4.139	3.378	10.14
12.99	5.041	5.38	4.087	10.8
12.95	6.115	6.265	5.061	11.85
13.01	7.05	7.51	6.158	10.26
13.17	7.86	7.86	6.516	11.33
13.35	8.06	8.13	7.22	8.75
13.53	7.39	8.18	6.994	12.4
13.64	7.08	7.89	6.765	10.13
13.73	7.01	7.47	6.639	6.978
13.8	6.266	7.14	6.257	6.691
13.84	5.823	6.348	5.786	4.388
13.84	5.573	5.781	5.545	2.65
13.82	5.524	5.729	5.502	3.4
13.78	5.095	5.511	5.069	5.49
13.73	4.215	5.122	4.162	3.807
13.64	4.115	4.37	4.065	4.262
13.57	3.889	4.247	3.785	0.855
13.51	3.76	4.079	3.694	4.185
13.44	3.334	3.943	3.298	3.324
13.37	2.941	3.484	2.897	3.898
13.28	2.186	3.035	2.185	6.537
13.19	2.383	2.392	2.135	1.607
13.13	2.451	2.54	2.342	7.07
13.06	2.728	2.926	2.447	8.67
12.99	2.907	3.266	2.645	10.04
12.97	3.808	3.834	2.847	6.435
12.97	4.591	4.597	3.706	8.49
12.95	5.473	5.473	4.581	10.05
12.97	6.477	6.544	5.471	7.74
12.99	6.757	6.757	6.288	10.38
13.06	5.427	6.753	4.584	10.02
13.1	6.446	6.709	5.478	8.37
13.15	5.627	6.797	5.544	11.64
13.17	5.063	5.986	4.863	7.97
13.17	5.034	5.258	5.001	6.111
13.15	4.575	5.169	4.566	10.87
13.1	4.554	4.585	4.431	8.48
13.08	4.432	4.598	4.432	7.7
13.04	4.002	4.465	4.002	10.12
12.99	3.995	4.038	3.884	9.39
12.95	3.444	3.982	3.444	7.69
12.9	2.999	3.438	2.999	6.257
12.86	2.788	3.111	2.742	6.669
12.81	2.829	2.856	2.679	9.53
12.77	2.793	2.937	2.793	9.45
12.7	2.301	2.862	2.279	7.53
12.66	2.131	2.511	2.097	6.335
12.59	2.238	2.355	2.123	4.671
12.53	3.507	3.668	2.152	6.146
12.55	3.841	4.059	3.273	8.29
12.59	4.626	4.68	3.499	7.89
12.7	5.907	7.07	4.481	7.43
12.9	6.068	6.743	5.933	10.29
13.06	6.637	6.711	5.893	6.538
13.22	6.384	6.958	6.175	6.84
13.33	4.927	6.356	4.296	2.67
13.39	5.153	5.621	4.646	4.349
13.44	5.441	5.47	5.163	4.423
13.44	5.623	5.705	5.423	5.939
13.42	5.399	5.598	5.399	3.948
13.39	5.205	5.456	5.205	4.6
13.37	4.813	5.258	4.813	5.428
13.35	4.562	4.89	4.48	7.42
13.35	4.382	4.63	4.356	8.52
13.33	4.255	4.39	4.24	6.043
13.3	3.62	4.254	3.591	5.593
13.3	3.069	3.651	3.019	5.501
13.28	2.614	3.116	2.589	6.993
13.24	2.607	2.636	2.494	7.42
13.17	2.234	2.6	2.232	8.65
13.08	1.905	2.279	1.875	7.77
13.01	2.245	2.245	1.868	6.163
12.95	3.007	3.007	2.196	8.32
12.93	4.146	4.263	3.002	9.95
12.99	5.359	5.745	4.175	7.47
13.15	6.054	6.569	5.249	11.22
13.33	6.961	6.961	5.801	8.94
13.53	6.714	7.54	6.527	9.52
13.73	7.15	7.63	6.693	8.73
13.91	6.864	7.37	6.853	11.48
14.02	6.695	7.12	6.607	9.39
14.09	6.784	6.887	6.664	7.71
14.14	6.718	6.837	6.59	6.73
14.16	6.539	6.692	6.504	6.49
14.16	6.261	6.56	6.261	6.557
14.16	6.128	6.287	6.092	6.633
14.14	5.464	6.085	5.446	6.467
14.09	5.007	5.492	5.007	3.393
14.05	4.936	5.041	4.877	3.205
14	4.011	4.926	4.011	3.926
13.91	2.171	3.985	2.171	5.583
13.78	1.136	2.15	1.136	4.7
13.62	0.708	1.142	0.688	4.766
13.48	0.571	0.73	0.525	4.827
13.35	0.787	0.787	0.539	4.465
13.22	1.627	1.627	0.734	3.683
13.1	3.049	3.049	1.462	2.323
12.99	4.454	4.454	3.059	6.67
12.9	5.578	5.578	4.467	7.6
12.81	6.331	6.439	5.591	11.08
12.73	7.14	7.42	6.357	8.49
12.77	8.22	8.43	7.21	8.3
12.86	8.56	9.01	7.96	12.66
12.9	8.3	8.83	8.3	12.84
12.93	8.36	8.44	7.96	10.6
12.95	7.5	8.39	7.5	10.45
12.97	6.707	7.53	6.52	8.05
12.99	6.882	6.882	6.645	9.51
12.99	7.24	7.26	6.905	11.2
12.97	7.45	7.5	7.24	11.53
12.97	7.76	7.76	7.37	11.27
12.99	7.95	7.95	7.74	10.61
13.01	7.89	8.02	7.87	10.03
13.06	8.16	8.21	7.9	11.76
13.1	7.96	8.17	7.96	12.25
13.1	7.88	7.99	7.88	12.48
13.06	7.76	7.91	7.72	14.69
12.99	8.17	8.17	7.75	14.34
12.95	8.3	8.46	8.16	13.17
12.97	8.76	8.91	8.3	7.64
13.01	8.44	8.87	8.44	9.45
13.06	8.57	8.75	8.35	7.05
13.1	8.92	9	8.49	5.721
13.15	9.39	9.39	9.01	4.236
13.24	11.15	11.62	8.27	1.508
13.39	9.66	11.34	9.42	7.69
13.55	8.36	9.78	8.04	4.819
13.64	8.91	9.23	8.36	5.593
13.73	8.59	8.91	8.52	5.715
13.78	8.13	8.61	8.06	6.223
13.8	7.44	8.25	7.44	8.4
13.8	7.14	7.76	7.13	8.26
13.78	7.22	7.34	7	8.09
13.75	6.828	7.19	6.679	7.83
13.75	7.03	7.31	6.824	6.698
13.75	6.645	7.09	6.645	5.914
13.75	6.637	6.92	6.482	4.986
13.78	6.57	7.03	6.495	6.235
13.78	6.763	7.01	6.574	5.164
13.8	6.724	6.91	6.478	5.855
13.82	6.417	6.786	6.383	7.06
13.84	6.762	6.876	6.395	4.507
13.84	6.599	6.747	6.555	6.111
13.87	6.555	6.629	6.412	3.956
13.87	6.462	6.572	6.317	5.603
13.87	6.583	7.04	6.478	5.789
13.87	7.49	7.68	6.515	3.394
13.89	7.94	8.13	7.31	5.344
13.96	8.54	8.8	7.86	4.772
14.05	9.45	9.45	8.57	2.812
14.14	9.37	9.43	9.02	4.151
14.23	9.56	9.76	9.36	5.578
14.27	9.53	9.62	9.37	5.036
14.32	9.46	9.66	9.39	4.164
14.36	9.54	9.62	9.38	4.299
14.38	7.52	9.48	7.52	4.977
14.36	7.51	7.74	7.24	3.051
14.36	6.866	7.47	6.807	3.436
14.34	6.317	6.952	6.317	4.288
14.29	5.749	6.301	5.749	3.134
14.23	5.551	5.856	5.419	3.507
14.18	5.074	5.53	4.886	3.577
14.11	4.572	5.296	4.55	3.863
14.02	4.116	4.825	4.109	2.847
13.96	3.878	4.103	3.81	2.808
13.87	3.733	4.111	3.594	0.086
13.78	3.475	3.735	3.146	2.032
13.71	3.593	4.026	3.28	3.891
13.66	5.174	5.325	3.366	2.193
13.66	6.966	6.966	4.428	4.207
13.78	8.43	8.51	6.573	3.342
13.98	8.88	10.13	7.49	5.921
14.29	9.65	10.89	8.34	4.752
14.67	11.64	12.36	9.25	3.109
15.03	11.52	12.14	10.38	5.004
15.35	11.08	11.76	10.5	4.121
15.62	10.32	11.4	10.15	6.919
15.81	8.63	10.3	8.63	8.21
15.9	7.92	8.62	7.83	5.112
15.92	6.868	8.06	6.868	6.129
15.9	6.561	6.956	6.43	3.229
15.83	6.18	6.66	6.16	3.616
15.76	5.936	6.485	5.887	3.399
15.69	5.767	6.038	5.666	1.614
15.6	6.053	6.071	5.16	2.962
15.53	5.964	6.211	5.614	3.566
15.46	6.104	6.155	5.457	2.807
15.39	5.858	6.225	5.858	0.78
15.32	5.889	6.104	5.679	0.09
15.25	5.337	5.955	5.141	2.131
15.16	5.419	5.519	5.081	2.351
15.07	5.731	5.783	5.226	0.368
15.03	6.849	6.867	5.578	3.876
14.98	7.55	7.79	6.653	3.139
15	8.9	9.63	7.36	4.072
15.12	10.55	11.06	8.64	3.608
15.32	11.07	12.35	10.15	1.91
15.55	11.57	12.65	10.89	1.669
15.83	11.33	13.24	11.33	2.578
16.13	11.46	12.81	11.18	2.719
16.36	11.62	12.28	11.3	2.247
16.5	10.09	11.82	10.06	4.945
16.57	8.36	10.08	8.36	5.897
16.57	7.52	8.21	7.48	5.4
16.52	7.27	7.63	6.931	3.522
16.43	6.876	7.41	6.795	2.287
16.34	6.626	7.08	6.429	4.027
16.22	6.242	6.635	6.242	2.474
16.13	5.546	6.335	5.546	5.713
16.04	5.754	6.01	5.365	3.926
15.94	5.651	6.03	5.361	3.305
15.87	4.439	5.751	4.439	2.461
15.78	3.293	4.421	3.293	4.676
15.67	3.851	4.039	3.227	3.741
15.55	3.831	4.448	3.676	4.798
15.44	3.238	3.949	3.238	4.643
15.35	4.219	4.268	3.317	4.684
15.28	6.563	6.563	3.827	3.795
15.3	8.42	8.48	6.282	9.65
15.41	9.31	9.78	8.04	8.11
15.62	9.97	10.42	8.79	7.7
15.9	10.95	11.09	9.21	8.04
16.15	9.69	10.86	9.34	11.36
16.38	8.48	9.61	8.14	12.31
16.52	7.27	8.2	7.01	9.72
16.62	6.396	7.2	6.228	7.06
16.64	6.123	6.518	5.782	6.807
16.59	5.853	6.161	5.581	4.717
16.5	5.136	5.866	5.053	5.75
16.36	4.94	5.254	4.614	6.055
16.22	4.602	4.946	4.449	7.71
16.08	5.173	5.314	4.526	6.724
15.97	5.577	5.757	4.917	5.965
15.87	5.911	6.077	5.423	6.236
15.81	6.195	6.293	5.882	9.22
15.69	5.999	6.33	5.999	9.14
15.58	5.449	6.046	5.427	7.48
15.46	5.213	5.519	5.075	8.13
15.37	5.279	5.379	5.083	10.27
15.25	5.286	5.71	5.279	10.29
15.12	5.393	5.473	5.049	11.51
15.03	5.737	6.451	5.251	11.21
15.05	6.717	7.33	5.758	8.81
15.14	7.82	8.06	6.303	11.5
15.32	9.53	9.61	7.77	8.7
15.58	9.97	10.5	8.87	12.18
15.78	10.18	10.63	9.85	16.49
15.94	10.19	10.56	10.01	16.92
16.06	8.58	9.98	8.58	16.88
16.11	7.98	8.79	7.93	14.53
16.08	7.43	7.93	7.32	11.64
16.01	6.655	7.29	6.655	11.56
15.9	6.348	6.853	6.33	8.26
15.76	6.177	6.445	5.944	7.19
15.64	5.28	6.134	5.28	7.58
15.53	4.936	5.587	4.741	4.077
15.39	4.662	5.161	4.557	5.432
15.3	4.599	4.945	4.477	4.621
15.19	4.456	4.691	4.34	5.544
15.09	4.563	4.688	4.332	4.588
14.98	4.265	4.616	4.265	2.534
14.89	4.609	4.633	4.257	4.559
14.78	5.486	5.558	4.508	2.004
14.71	6.329	6.329	5.432	4.387
14.65	6.141	6.824	6.087	7.12
14.62	7.09	7.23	5.963	7.29
14.6	7.33	7.7	6.858	8.63
14.6	7.94	8.12	7.39	8.29
14.64	8.63	8.76	7.92	5.996
14.69	9.01	9.16	8.42	10.06
14.76	8.9	9.34	8.83	8.09
14.8	8.61	9.09	8.61	8.09
14.84	8.36	8.9	8.35	8.89
14.87	8.36	8.68	8.28	9.47
14.84	8.08	8.55	8.08	8.96
14.82	7.69	8.1	7.62	8.96
14.8	7.33	7.79	6.934	5.923
14.78	7.1	7.4	7	6.257
14.76	7.17	7.42	7.05	9.35
14.73	7.34	7.48	7.16	8.08
14.71	7.73	7.78	7.39	7.18
14.71	7.74	7.92	7.56	8.57
14.71	7.53	7.78	7.25	6.89
14.71	7.4	7.59	7.31	10.31
14.67	7.52	7.69	7.34	8.35
14.64	7.54	7.63	7.48	9.07
14.62	7.5	7.84	7.5	7.94
14.6	7.11	7.63	7.04	9.49
14.56	7.19	7.54	6.951	11.85
14.54	7.43	7.77	7.2	10.07
14.54	8.11	8.24	7.43	9.33
14.54	7.89	8.19	7.6	12.69
14.54	8.08	8.71	7.81	10.48
14.6	8.72	8.88	8.05	16.1
14.73	9.19	9.61	8.29	11.26
14.87	8.06	9.29	8.06	13.49
14.96	7.14	8.03	6.959	16.97
14.96	6.674	7.24	6.563	12.57
14.89	6.488	6.76	6.335	10.03
14.8	6.79	6.87	6.472	11.17
14.73	6.475	6.86	6.447	10.37
14.66	6.437	6.605	6.33	10.16
14.6	5.808	6.526	5.808	7.64
14.55	5.278	5.904	5.278	6.719
14.49	4.811	5.291	4.757	5.667
14.45	4.491	4.883	4.353	7.21
14.38	4.255	4.421	4.148	5.209
14.29	3.789	4.384	3.739	6.45
14.23	3.789	4.113	3.75	4.185
14.14	3.69	4.033	3.582	4.96
14.02	3.524	3.807	3.467	5.567
13.93	4.249	4.251	3.387	6.007
13.87	6.519	6.519	4.34	7.21
13.89	7.49	7.58	6.112	8.73
14	9.05	9.76	7.31	8.11
14.23	10.03	10.21	8.79	10.07
14.52	10.35	11.93	10.27	7.63
14.85	11.09	11.66	10.46	8.69
15.16	11.45	12.41	10.8	8.55
15.46	11.06	11.9	10.89	5.79
15.74	11.13	11.84	10.87	6.849
15.92	9.35	11.11	9.31	8.1
16.9	8.62	9.68	8.6	7.87
16.2	8.06	8.65	7.92	4.697
16.08	7.37	8.25	7.3	4.064
15.99	6.785	7.55	6.581	4.623
15.92	6.078	6.999	6.02	2.956
15.83	5.878	6.311	5.755	2.909
15.71	5.065	5.949	5.065	3.351
15.6	4.404	5.154	4.351	5.59
15.48	3.957	4.696	3.78	5.611
15.39	3.023	4.056	2.965	4.989
15.28	3.251	3.609	2.829	5.404
15.19	2.917	3.352	2.347	4.734
15.07	3.646	3.74	2.935	3.55
14.98	4.226	4.511	3.524	2.907
14.91	4.591	4.81	3.91	5.811
14.84	5.205	5.444	4.487	7.13
14.78	6.079	6.079	5.039	6.487
14.73	6.454	6.454	5.84	6.734
14.69	7	7.16	6.234	8.34
14.67	7.2	7.39	6.997	8.1
14.69	7.6	7.75	7.06	7.3
14.69	7.97	8.03	7.4	6.548
14.69	7.46	8.09	7.46	9.82
14.67	7.61	7.78	7.44	5.233
14.67	7.17	7.69	7.14	6.528
14.65	7.47	7.53	6.998	7.41
14.6	7.23	7.68	7.02	8.29
14.56	6.716	7.34	6.601	12.66
14.49	6.628	6.689	6.458	7.08
14.47	6.721	6.924	6.36	5.62
14.43	6.682	7.14	6.682	5.954
14.41	6.71	7.13	6.629	7.32
14.38	6.722	6.817	6.57	7.27
14.38	6.675	7.06	6.519	8.62
14.36	6.276	6.932	6.271	9.57
14.32	6.092	6.312	6.008	7.43
14.29	6.506	6.634	5.979	4.872
14.25	6.343	6.493	6.014	6.931
14.23	6.861	7.15	6.138	6.385
14.2	7.31	7.31	6.448	9.02
14.2	7.72	7.85	7.16	7.38
14.23	8.11	8.7	7.56	9.89
14.25	8.83	9.29	7.95	7.04
14.32	8.58	9.07	8.56	9.24
14.38	8.71	9.05	8.41	7.27
14.45	8.32	8.9	8.01	9.63
14.47	8.11	8.49	7.91	10.44
14.49	7.95	8.49	7.93	8.45
14.49	7.51	8.06	7.51	9.71
14.47	7.19	7.66	7.13	7.32
14.43	6.741	7.3	6.657	9
14.38	6.245	6.754	6.241	10.88
14.36	6.444	6.758	6.235	9.06
14.29	6.384	6.613	6.289	8.4
14.25	6.241	6.59	6.235	7.98
14.23	6.233	6.618	6.138	8.25
14.2	6.176	6.516	6.074	5.984
14.16	6.297	6.493	6.099	8.35
14.14	5.515	6.415	5.515	10.38
14.09	5.888	6.133	5.491	5.955
14.05	5.352	5.887	5.352	8.95
14	5.992	6.202	5.279	7.01
13.98	6.311	6.599	5.884	6.792
13.96	6.91	6.91	6.298	7.63
13.93	7.07	7.27	6.677	9.87
13.96	8.88	8.88	7.14	4.855
14.02	9.46	9.64	8.33	6.5
14.09	9.51	9.77	9.08	7.11
14.18	10.05	10.49	9.5	6.625
14.29	10.48	10.91	10.01	6.209
14.38	10.93	11.31	10.49	5.82
14.47	10.66	11.18	10.66	8.77
14.51	10.13	10.72	10.13	9.91
14.52	9.44	10.12	9.43	8.65
14.52	9.06	9.41	8.99	3.361
14.51	9.06	9.22	8.79	2.7
14.54	8.55	8.98	8.42	5.268
14.54	8.26	8.65	8.1	4.327
14.54	8.35	8.35	8.08	1.861
14.54	8.2	8.42	8.19	0.522
14.56	8.12	8.27	8.11	1.915
14.58	8.17	8.33	8.13	2.755
14.58	8.29	8.35	8.13	1.552
14.58	8.31	8.32	8.19	2.294
14.6	8.5	8.53	8.3	3.026
14.62	8.51	8.83	8.39	3.801
14.65	9.27	9.27	8.54	5.537
14.67	10.01	10.02	9.26	6.261
14.73	10.86	11.06	10.06	7.53
14.85	11.28	11.56	10.72	7.57
14.98	11.49	11.78	11.2	8.68
15.09	11.4	12	11.29	9.93
15.21	11.38	11.72	11.33	9.81
15.35	10.98	11.8	10.8	8.88
15.44	9.93	11.02	9.89	10.85
15.51	9.61	10.05	9.42	6.683
15.53	9.29	9.61	9.21	7.48
15.51	9.21	9.31	9.16	4.315
15.51	9.09	9.34	8.99	2.682
15.48	8.62	9.05	8.62	5.263
15.46	8.16	8.62	8.08	6.655
15.39	7.87	8.17	7.86	7.75
15.35	7.59	7.9	7.59	4.99
15.28	7.16	7.61	7.16	2.156
15.23	6.183	7.15	6.183	3.23
15.16	5.192	6.163	5.185	4.064
15.09	4.739	5.184	4.721	4.283
15	4.513	4.754	4.485	2.106
14.91	4.912	5.395	4.521	2.714
14.8	6.274	6.439	4.901	1.194
14.75	7.58	7.82	6.122	2.342
14.78	9.52	9.72	7.53	1.108
14.93	11.47	12.21	9.74	2.136
15.23	13.31	13.67	10.74	2.564
15.62	12.28	13.97	11.35	4.752
16.06	13.12	14.55	11.96	3.797
16.48	14.54	14.73	12.78	5.386
16.9	14.82	15.24	12.9	3.712
17.23	13.06	14.93	12.8	4.789
17.44	12.33	13.4	12.26	5.506
17.53	11.46	12.4	11.23	8.12
17.56	10.78	11.51	10.6	7.13
17.49	10.12	10.81	10	6.315
17.44	9.54	10.25	9.45	5.965
17.37	9.56	9.75	9.33	2.231
17.3	9.03	9.67	9.03	4.824
17.2	8.91	9.53	8.82	2.795
17.16	8.81	9.29	8.63	3.613
17.09	8.52	8.87	8.48	2.489
16.97	8.79	8.91	8.46	0.208
16.92	8.53	8.82	8.43	1.476
16.83	8.49	8.78	8.44	0.297
16.78	8.61	8.93	8.48	2.521
16.71	8.89	8.89	8.48	0.343
16.66	9.36	9.49	8.86	2.833
16.62	9.21	9.87	9.15	4.301
16.59	9.55	10.05	9.12	3.728
16.59	10.1	10.34	9.38	0.793
16.59	10.3	10.59	9.89	2.745
16.59	10.01	10.61	9.89	4.239
16.64	10.31	10.49	9.88	4.66
16.66	10.13	10.29	9.98	5.982
16.66	10.03	10.18	9.89	6.244
16.66	10.02	10.26	9.88	6.936
16.62	10.07	10.18	9.9	5.443
16.57	9.87	10.17	9.87	5.06
16.5	9.83	10.06	9.74	0.883
16.45	9.73	9.93	9.72	3.483
16.41	9.6	9.77	9.6	3.521
16.36	9.05	9.66	9.01	7.36
16.31	8.81	9.07	8.74	6.495
16.24	8.28	8.85	8.28	5.007
16.18	7.69	8.26	7.69	5.242
16.11	7.27	7.72	7.27	5.593
16.04	6.749	7.26	6.739	5.667
15.92	6.436	6.758	6.336	6.057
[truncated: 6,785 more rows]
